# Supplementary material for: Genome-wide characterization and expression analysis of the CONSTANS-like gene family of Juglans mandshurica Maxim
Source: PeerJ. 2025 Apr 18;13:e19169. doi: 10.7717/peerj.19169 (PMC12011014; doi:10.7717/peerj.19169)
Supplement: Supplemental Information 1 [file peerj-13-19169-s001.xls]

## Sheet: Sheet1
ITEM TO CHECK	IMPORTANCE	CHECKLIST
EXPERIMENTAL DESIGN
Definition of experimental and control groups	E	115-122
Number within each group	E	123-124
Assay carried out by core lab or investigator's lab?	D
Acknowledgement of authors' contributions	D
SAMPLE
Description	E	115-122,125-127
Volume/mass of sample processed	D
Microdissection or macrodissection	E	No
Processing procedure	E	123-124,127-128
If frozen - how and how quickly?	E	123-124,127-128
If fixed - with what, how quickly?	E
Sample storage conditions and duration (especially for FFPE samples)	E	123-124,127-128
NUCLEIC ACID EXTRACTION
Procedure and/or instrumentation	E	171-176
Name of kit and details of any modifications	E	No
Source of additional reagents used	D
Details of DNase or RNAse treatment	E	171-176
Contamination assessment (DNA or RNA)	E	171-176
Nucleic acid quantification	E	171-176
Instrument and method	E	171-176
Purity (A260/A280)	D
Yield	D
RNA integrity method/instrument	E	No
RIN/RQI or Cq of 3' and 5' transcripts	E	No
Electrophoresis traces	D
Inhibition testing (Cq dilutions, spike or other)	E	No
REVERSE TRANSCRIPTION
Complete reaction conditions	E	175-177
Amount of RNA and reaction volume	E	175-177
Priming oligonucleotide (if using GSP) and concentration	E	175-177
Reverse transcriptase and concentration	E	175-177
Temperature and time	E	175-177
Manufacturer of reagents and catalogue numbers	D
Cqs with and without RT	D*
Storage conditions of cDNA	D
qPCR TARGET INFORMATION
If multiplex, efficiency and LOD of each assay.	E	No
Sequence accession number	E	No
Location of amplicon	D
Amplicon length	E	No
In silico specificity screen (BLAST, etc)	E	No
Pseudogenes, retropseudogenes or other homologs?	D
Sequence alignment	D
Secondary structure analysis of amplicon	D
Location of each primer by exon or intron (if applicable)	E	No
What splice variants are targeted?	E	No
qPCR OLIGONUCLEOTIDES
Primer sequences	E	Supplymental files Table 1
RTPrimerDB Identification Number	D
Probe sequences	D**
Location and identity of any modifications	E	No
Manufacturer of oligonucleotides	D
Purification method	D
qPCR PROTOCOL
Complete reaction conditions	E	Supplymental files Table 2
Reaction volume and amount of cDNA/DNA	E	Supplymental files Table 2
Primer, (probe), Mg++ and dNTP concentrations	E	Supplymental files Table 2
Polymerase identity and concentration	E	Supplymental files Table 2
Buffer/kit identity and manufacturer	E	180
Exact chemical constitution of the buffer	D
Additives (SYBR Green I, DMSO, etc.)	E	Supplymental files Table 2
Manufacturer of plates/tubes and catalog number	D
Complete thermocycling parameters	E	Supplymental files Table 2
Reaction setup (manual/robotic)	D
Manufacturer of qPCR instrument	E	Supplymental files Table 2
qPCR VALIDATION
Evidence of optimisation (from gradients)	D
Specificity (gel, sequence, melt, or digest)	E	No
For SYBR Green I, Cq of the NTC	E	No
Standard curves with slope and y-intercept	E	No
PCR efficiency calculated from slope	E	No
Confidence interval for PCR efficiency or standard error	D
r2 of standard curve	E	No
Linear dynamic range	E	No
Cq variation at lower limit	E	No
Confidence intervals throughout range	D
Evidence for limit of detection	E	No
If multiplex, efficiency and LOD of each assay.	E	No
DATA ANALYSIS
qPCR analysis program (source, version)	E	Supplymental files Table 2
Cq method determination	E	Supplymental files Table 2
Outlier identification and disposition	E	Supplymental files Table 2
Results of NTCs	E	No
Justification of number and choice of reference genes	E	177-179
Description of normalisation method	E	181-182
Number and concordance of biological replicates	D
Number and stage (RT or qPCR) of technical replicates	E	Supplymental files Table 2
Repeatability (intra-assay variation)	E	Supplymental files Table 2
Reproducibility (inter-assay variation, %CV)	D
Power analysis	D
Statistical methods for result significance	E	181-184
Software (source, version)	E	181-184
Cq or raw data submission using RDML	D
Table 1. MIQE checklist for authors, reviewers and editors. All essential information (E) must be submitted with the manuscript. Desirable
information (D) should be submitted if available. If using primers obtained from RTPrimerDB, information on qPCR target, oligonucleotides,
protocols and validation is available from that source.
*: Assessing the absence of DNA using a no RT assay is essential when first extracting RNA. Once the sample has been validated as
RDNA-free, inclusion of a no-RT control is desirable, but no longer essential.
**: Disclosure of the probe sequence is highly desirable and strongly encouraged. However, since not all commercial pre-designed assay
vendors provide this information, it cannot be an essential requirement. Use of such assays is advised against.
