# Supplementary material for: Genome-wide characterization and expression analysis of the CONSTANS-like gene family of Juglans mandshurica Maxim
Source: PeerJ. 2025 Apr 18;13:e19169. doi: 10.7717/peerj.19169 (PMC12011014; doi:10.7717/peerj.19169)
Supplement: Supplemental Information 4 [file peerj-13-19169-s004.xlsx]

## Sheet: Quantitative primer sequence
Gene name	Quantitative primer sequence (5'-3')
Actin	F: ATGCCCAGAAGTCTTGTTCC	R: TGCTCATACGGTCAGCGATA
JmCOL2	F: ACGAAGAGGATGAAGATGAG	R: TGTTGTTGCTGGTGGTAG
JmCOL4a	F: CACCACCTTCTACGACTC	R: CTCGCCATCACCTTGTTA
JmCOL5	F: GACATCCACTCGGCTAAC	R: GTCGTCGTTGGTGTTGTT
JmCOL6	F: GTAGAGAAGCAAGAGTATCAAG	R: CAGCAGCAGTAGGAATAGAT
JmCOL9a	F: ACAAGACAAGCACATTCAAG	R: ATCGCATAACAGCATCACT
JmCOL10	F: CAGGCAGTCAGCAGTTAC	R: CGAATTGTGAGCAAGATTGT
JmCOL13	F: CAGATATTGGTGGCAGTGT	R: CCTTGTAGCGTGAGAGTG
JmCOL14	F: GGAGACTTGTACCAGATGAA	R: TTAGAGCCACCAGAACCT
JmCOL16a	F: CTTCTGCCTTGTGTTCCT	R: TAATCTTCAGCCACCATTCT

## Sheet: Locus ID
Gene name	Locus ID
JmCOL2	JMA012135
JmCOL4a	JMA031564
JmCOL4b	JMA004774
JmCOL5	JMA008296
JmCOL6	JMA020086
JmCOL9a	JMA004947
JmCOL9b	JMA029849
JmCOL10	JMA026904
JmCOL11	JMA000719
JmCOL12	JMA001149
JmCOL13	JMA026099
JmCOL14	JMA017943
JmCOL15	JMA022230
JmCOL16a	JMA033005
JmCOL16b	JMA019919
