# Supplementary material for: Genome-wide characterization and expression analysis of the CONSTANS-like gene family of Juglans mandshurica Maxim
Source: PeerJ. 2025 Apr 18;13:e19169. doi: 10.7717/peerj.19169 (PMC12011014; doi:10.7717/peerj.19169)
Supplement: Supplemental Information 5 [file peerj-13-19169-s005.xlsx]

## Sheet: qRT-PCR
Information of qPCR instrument	Model	Name	Manufacturer of qPCR instrument
Device:	qTOWER3/G	3107B-0545	analytikjena
Heated Lid:	105°C
TC Protocol:	steps	scan	°C	m:s	goto	loops	delta Temp(°C)	delta Time (s)	ramp (°C/s
	1		95	0.0208333	0	0	0	0	8
	2		95	0.00694444	0	0	0	0	8
	3		55	0.00694444	0	0	0	0	6
	4	*	72	0.0208333	2	40	0	0	6
	5	*	60	0.0104167	5	35	1	0	5
Meas. Repeats:	3
Complete reaction conditions
Taq Pro Universal SYBR qPCR Master Mix		10 μL	including dNTP, Mg²⁺, Champagne Taq DNA Polymerase, YBR Green l, Specific ROX Reference Dye etc.
Primer-F(10 μM)		0.4 μL
Primer-R (10 μM)		0.4 μL
Reaction volume and amount of cDNA(0.1-1 μM)		x μL
ddH₂O		add up to 20 μL
