# Supplementary material for: Genome-wide characterization and expression analysis of the CONSTANS-like gene family of Juglans mandshurica Maxim
Source: PeerJ. 2025 Apr 18;13:e19169. doi: 10.7717/peerj.19169 (PMC12011014; doi:10.7717/peerj.19169)
Supplement: Supplemental Information 6 [file peerj-13-19169-s006.xlsx]

## Sheet: COL2,4a,5,6,9,10
Title:	Takara
Date/Time:	2024/3/21	10:37:25
Device:	qTOWER3/G	3107B-0545
Operator:	Wangzhibo
JmCOLmments:
JmCOLlors+Dyes:	Pos	JmCOLlor Module	Dye	Gain	Meas	Refr
	1	Blue.470.520.11.3	FAM	5	*
	2	Green.515.545.11.2	JOE	5
	3	Yellow.535.580.11.2	TAMRA	5
	4	Orange.565.605.11.2	ROX	5
	5	Red.630.670.11.1	Cy5	5
	6	NIR1.660.705.11.1	Cy5.5	5
Heated Lid:	105°C
TC ProtoJmCOLl:	steps	scan	°C	m:s	goto	loops	delta Temp(°C)	delta Time (s)	ramp (°C/s
	1		95	00:30	0	0	0	0	8
	2		95	00:10	0	0	0	0	8
	3		55	00:10	0	0	0	0	6
	4	*	72	00:30	2	40	0	0	6
	5	*	60	00:15	5	35	1	0	5
Melt active:	Yes
Meas. Repeats:	3
JmCOLlor JmCOLmp.:
	Sample Name	样品类型	染料	基因	Ct	Ct average	Corrected mean	Average value of internal reference	Δct	ΔΔct		JmCOL9	9	The Value of ΔΔCt	The standard error of ΔΔct
G4	JmCOL9a-Stem	未知样品	FAM		26.04	26.03	26.03	22.335	3.695	0	1	S	Stem	1	0
G5	JmCOL9a-Stem	未知样品	FAM		25.27	26.03						FB	Flower bud	0.356013	0.03439
G6	JmCOL9a-Stem	未知样品	FAM		26.78	26.03						F	Fruit	0.619138	0.01735
G10	JmCOL9a-Flower bud	未知样品	FAM		28.57	28.57	28.57	23.385	5.185	1.49	0.356013	LF	Leaf	0.294227	0.01791
G11	JmCOL9a-Flower bud	未知样品	FAM		28.81	28.57
G12	JmCOL9a-Flower bud	未知样品	FAM		28.33	28.57
G1	JmCOL9a-Fruit	未知样品	FAM		28.81	28.94	28.74	24.3533	4.38667	0.691667	0.619138
G2	JmCOL9a-Fruit	未知样品	FAM		28.67	28.94
G3	JmCOL9a-Fruit	未知样品	FAM		29.35	28.94
G7	JmCOL9a-Leaf	未知样品	FAM		23.25	23.12	23.275	17.815	5.46	1.765	0.294227
G8	JmCOL9a-Leaf	未知样品	FAM		23.3	23.12
G9	JmCOL9a-Leaf	未知样品	FAM		22.82	23.12						JmCOL6		The Value of ΔΔCt	The standard error of ΔΔct
F4	JmCOL6-Stem	未知样品	FAM		28.96	28.75	28.7533	22.335	6.41833	0	1	S	Stem	1	0
F5	JmCOL6-Stem	未知样品	FAM		28.42	28.75						FB	Flower bud	0.0354845	0.00329
F6	JmCOL6-Stem	未知样品	FAM		28.88	28.75						F	Fruit	0.3614	0.01169
F10	JmCOL6-Flower bud	未知样品	FAM		34.62	34.62	34.62	23.385	11.235	4.81667	0.0354845	LF	Leaf	2.17096	0.25733
F11	JmCOL6-Flower bud	未知样品	FAM		34.42	34.62
F12	JmCOL6-Flower bud	未知样品	FAM		34.82	34.62
F1	JmCOL6-Fruit	未知样品	FAM		32.17	31.85	32.24	24.3533	7.88667	1.46833	0.3614
F2	JmCOL6-Fruit	未知样品	FAM		31.08	31.85
F3	JmCOL6-Fruit	未知样品	FAM		32.31	31.85
F7	JmCOL6-Leaf	未知样品	FAM		23.37	23.51	23.115	17.815	5.3	-1.11833	2.17096
F8	JmCOL6-Leaf	未知样品	FAM		22.86	23.51
F9	JmCOL6-Leaf	未知样品	FAM		24.32	23.51						JmCOL5		The Value of ΔΔCt	The standard error of ΔΔct
E4	JmCOL5-Stem	未知样品	FAM		30.85	31.93	30.84	22.335	8.505	0	1	S	Stem	1	0
E5	JmCOL5-Stem	未知样品	FAM		34.1	31.93						FB	Flower bud	1.87254	0.35545
E6	JmCOL5-Stem	未知样品	FAM		30.83	31.93						F	Fruit	2.57279	0.46729
E10	JmCOL5-Flower bud	未知样品	FAM		30.33	30.77	30.985	23.385	7.6	-0.905	1.87254	LF	Leaf	0.835088	0.1046
E11	JmCOL5-Flower bud	未知样品	FAM		31	30.77
E12	JmCOL5-Flower bud	未知样品	FAM		30.97	30.77
E1	JmCOL5-Fruit	未知样品	FAM		32.49	31.8267	31.495	24.3533	7.14167	-1.36333	2.57279
E2	JmCOL5-Fruit	未知样品	FAM		31.94	31.8267
E3	JmCOL5-Fruit	未知样品	FAM		31.05	31.8267
E7	JmCOL5-Leaf	未知样品	FAM		26.89	26.24	26.58	17.815	8.765	0.26	0.835088
E8	JmCOL5-Leaf	未知样品	FAM		26.27	26.24
E9	JmCOL5-Leaf	未知样品	FAM		25.55	26.24						JmCOL4a		The Value of ΔΔCt	The standard error of ΔΔct
C4	JmCOL4a-Stem	未知样品	FAM		30.37	33.32	32.5	22.335	10.165	0	1	S	Stem	1	0
C5	JmCOL4a-Stem	未知样品	FAM		34.63	33.32						FB	Flower bud	9.35022	0.39333
C6	JmCOL4a-Stem	未知样品	FAM		34.96	33.32						F	Fruit	11.4584	0.64323
C10	JmCOL4a-Flower bud	未知样品	FAM		29.91	30.19	30.325	23.385	6.94	-3.225	9.35022	LF	Leaf	12.8616	0.5604
C11	JmCOL4a-Flower bud	未知样品	FAM		30.22	30.19
C12	JmCOL4a-Flower bud	未知样品	FAM		30.43	30.19
C1	JmCOL4a-Fruit	未知样品	FAM		31.14	30.76	31	24.3533	6.64667	-3.51833	11.4584
C2	JmCOL4a-Fruit	未知样品	FAM		30.27	30.76
C3	JmCOL4a-Fruit	未知样品	FAM		30.86	30.76
C7	JmCOL4a-Leaf	未知样品	FAM		24.32	24.37	24.295	17.815	6.48	-3.685	12.8616
C8	JmCOL4a-Leaf	未知样品	FAM		24.27	24.37
C9	JmCOL4a-Leaf	未知样品	FAM		24.51	24.37						JmCOL2		The Value of ΔΔCt	The standard error of ΔΔct
B4	JmCOL2-Stem	未知样品	FAM		34.43	33.84	34.22	22.335	11.885	0	1	S	Stem	1	0
B5	JmCOL2-Stem	未知样品	FAM		33.08	33.84						FB	Flower bud	5.04116	1.78463
B6	JmCOL2-Stem	未知样品	FAM		34.01	33.84						F	Fruit	2.90187	0.5766
B10	JmCOL2-Flower bud	未知样品	FAM		31.55	31.82	31.565	23.385	8.18	-3.705	13.0412	LF	Leaf	8.38338	2.06846
B11	JmCOL2-Flower bud	未知样品	FAM		31.58	31.82
B12	JmCOL2-Flower bud	未知样品	FAM		32.34	31.82
B1	JmCOL2-Fruit	未知样品	FAM		34.03	34.17	33.945	24.3533	9.59167	-2.29333	4.90187
B2	JmCOL2-Fruit	未知样品	FAM		33.86	34.17
B3	JmCOL2-Fruit	未知样品	FAM		34.63	34.17
B7	JmCOL2-Leaf	未知样品	FAM		24.84	24.28	24.555	17.815	6.74	-5.145	35.3834
B8	JmCOL2-Leaf	未知样品	FAM		24.27	24.28
B9	JmCOL2-Leaf	未知样品	FAM		23.73	24.28						JmCOL10		The Value of ΔΔCt	The standard error of ΔΔct
H4	JmCOL10-Stem	未知样品	FAM		30.39	31.09	31.44	22.335	9.105	0	1	S	Stem	1	0
H5	JmCOL10-Stem	未知样品	FAM		31.56	31.09						FB	Flower bud	4.42292	0.02655
H6	JmCOL10-Stem	未知样品	FAM		31.32	31.09						F	Fruit	3.89962	0.70827
H10	JmCOL10-Flower bud	未知样品	FAM		30.33	30.28	30.345	23.385	6.96	-2.145	4.42292	LF	Leaf	0.816134	0.00597
H11	JmCOL10-Flower bud	未知样品	FAM		30.17	30.28
H12	JmCOL10-Flower bud	未知样品	FAM		30.36	30.28
H1	JmCOL10-Fruit	未知样品	FAM		32.49	31.83	31.495	24.3533	7.14167	-1.96333	3.89962
H2	JmCOL10-Fruit	未知样品	FAM		31.94	31.83
H3	JmCOL10-Fruit	未知样品	FAM		31.05	31.83
H7	JmCOL10-Leaf	未知样品	FAM		29.26	29.17	29.13	17.815	11.315	2.21	0.216134
H8	JmCOL10-Leaf	未知样品	FAM		29.14	29.17
H9	JmCOL10-Leaf	未知样品	FAM		29.12	29.17
A4	A-Stem	未知样品	FAM		22.44	21.93	22.335
A5	A-Stem	未知样品	FAM		22.23	21.93
A6	A-Stem	未知样品	FAM		21.13	21.93
A10	A-Flower bud	未知样品	FAM		23.35	23.2	23.385
A11	A-Flower bud	未知样品	FAM		22.83	23.2
A12	A-Flower bud	未知样品	FAM		23.42	23.2
A1	A-Fruit	未知样品	FAM		24.21	24.36	24.3533
A2	A-Fruit	未知样品	FAM		24.43	24.36
A3	A-Fruit	未知样品	FAM		24.42	24.36
A7	A-Leaf	未知样品	FAM		17.79	17.28	17.815
A8	A-Leaf	未知样品	FAM		16.2	17.28
A9	A-Leaf	未知样品	FAM		17.84	17.28

## Sheet: COL16a
				Ct	Ct average	Corrected mean	Average value of internal reference	Δct	ΔΔct						Ct	Ct average	JmCOLrrected mean	Average value of internal reference	Δct	ΔΔct
Stem-JmCOL16	unknown sample	FAM		28.32	28.92	29.215	21.98	7.235	0	1	Stem-A	unknown sample	FAM		21.4	21.98
Stem-JmCOL16	unknown sample	FAM		29.21	28.92			6.34	0	1	Stem-A	unknown sample	FAM		22.96	21.98
Stem-JmCOL16	unknown sample	FAM		29.22	28.92			7.24	0	1	Stem-A	unknown sample	FAM		21.57	21.98
Flower bud-JmCOL16	unknown sample	FAM		34.41	34.57	34.385	26.52	7.865	0.63	0.646176	Flower bud-A	unknown sample	FAM		25.85	26.52
Flower bud-JmCOL16	unknown sample	FAM		34.93	34.57			8.41	1.175	0.442884	Flower bud-A	unknown sample	FAM		27.48	26.52
Flower bud-JmCOL16	unknown sample	FAM		34.36	34.57			7.89	0.655	0.635075	Flower bud-A	unknown sample	FAM		26.24	26.52
Fruit-JmCOL16	unknown sample	FAM		无Ct		35.525	29.15	6.375	-0.86	1.81504	Fruit-A	unknown sample	FAM		28.07	29.15
Fruit-JmCOL16	unknown sample	FAM		35.68	35.53			6.53	-0.705	1.63014	Fruit-A	unknown sample	FAM		31.06	29.15
Fruit-JmCOL16	unknown sample	FAM		35.37	35.53			6.22	-1.015	2.0209	Fruit-A	unknown sample	FAM		28.31	29.15
Leaf-JmCOL16	unknown sample	FAM		25.1	25.11	25.08	21.71	3.37	-3.865	14.5707	Leaf-A	unknown sample	FAM		21.49	21.71
Leaf-JmCOL16	unknown sample	FAM		25.06	25.11			3.39	-3.845	14.3701	Leaf-A	unknown sample	FAM		21.87	21.71
Leaf-JmCOL16	unknown sample	FAM		25.18	25.11			3.47	-3.765	13.595	Leaf-A	unknown sample	FAM		21.75	21.71
JmCOL16		The Value of ΔΔCt	The standard error of ΔΔct
S	Stem	1	0
FB	Flower bud	0.646176	0.0659919
F	Fruit	1.81504	0.112856
LF	Leaf	14.5707	0.297509

## Sheet: COL14
		genomics	Ct	Ct average	Corrected mean	Average value of internal reference	Δct	ΔΔct						Ct	Ct average	JmCOLrrected mean	Average value of internal reference	Δct	ΔΔct
Stem-JmCOL14	unknown sample	FAM	28.62	29.46	28.92	21.98	6.94	0	1		Stem-A	Unknown Sample	FAM		21.4	21.98
Stem-JmCOL14	unknown sample	FAM	30.56	29.46			8.58	0	1		Stem-A	Unknown Sample	FAM		22.96	21.98
Stem-JmCOL14	unknown sample	FAM	29.22	29.46			7.24	0	1		Stem-A	Unknown Sample	FAM		21.57	21.98
Flower bud-JmCOL14	unknown sample	FAM	34.52	35.42	34.89	26.52	8.37	1.43	0.371131		Flower bud-A	Unknown Sample	FAM		25.85	26.52
Flower bud-JmCOL14	unknown sample	FAM	35.26	35.42			8.74	1.8	0.287175		Flower bud-A	Unknown Sample	FAM		27.48	26.52
Flower bud-JmCOL14	unknown sample	FAM	36.49	35.42			9.97	3.03	0.122428		Flower bud-A	Unknown Sample	FAM		26.24	26.52
Fruit-JmCOL14	unknown sample	FAM	36.2	35.6	35.6	29.15	6.45	-0.49	1.40444		Fruit-A	Unknown Sample	FAM		28.07	29.15
Fruit-JmCOL14	unknown sample	FAM	35	35.6			5.85	-1.09	2.12874		Fruit-A	Unknown Sample	FAM		31.06	29.15
Fruit-JmCOL14	unknown sample	FAM	none				7.05	0.11	0.926588		Fruit-A	Unknown Sample	FAM		28.31	29.15
Leaf-JmCOL14	unknown sample	FAM	29.12	28.86	29.355	21.71	7.645	0.705	0.613442		Leaf-A	Unknown Sample	FAM		21.49	21.71
Leaf-JmCOL14	unknown sample	FAM	29.59	28.86			7.88	0.94	0.521233		Leaf-A	Unknown Sample	FAM		21.87	21.71
Leaf-JmCOL14	unknown sample	FAM	27.86	28.86			7.41	0.47	0.721965		Leaf-A	Unknown Sample	FAM		21.75	21.71
JmCOL14	The Value of ΔΔCt	The standard error of ΔΔct
S	Stem	1	0
FB	Flower bud	0.371131	0.0730463
F	Fruit	1.40444	0.349454
LF	Leaf	0.613442	0.05801

## Sheet: COL13
			Ct	Ct average	Corrected mean	Average value of internal reference	Δct	ΔΔct					Ct	Ct average
Stem-JmCOL13		31.09	31.14	30.325	21.98	8.345	0	1				Stem-A	21.4	21.98
Stem-JmCOL13		32.78	31.14			10.8	0	1				Stem-A	22.96	21.98
Stem-JmCOL13		29.56	31.14			7.58	0	1				Stem-A	21.57	21.98
Flower bud-JmCOL13		38	36.98	36.465	26.52	9.945	1.6	0.329877				Flower bud-A	25.85	26.52
Flower bud-JmCOL13		36.95	36.98			11.48	3.135	0.113834				Flower bud-A	27.48	26.52
Flower bud-JmCOL13		35.98	36.98			9.46	1.115	0.461691				Flower bud-A	26.24	26.52
Fruit-JmCOL13		38.78	37.3267	36.6	29.15	7.45	-0.895	1.85961				Fruit-A	28.07	29.15
Fruit-JmCOL13		35.65				9.63	1.285	0.410371				Fruit-A	31.06	29.15
Fruit-JmCOL13		37.55				8.4	0.055	0.962594				Fruit-A	28.31	29.15
Leaf-JmCOL13		29.96	32.1133	28.755	21.71	7.045	-1.3	2.46229				Leaf-A	21.49	21.71
Leaf-JmCOL13		27.55	33.19			5.84	-2.505	5.67649				Leaf-A	21.87	21.71
Leaf-JmCOL13		38.83	33.19			8.25	-0.095	1.06807				Leaf-A	21.75	21.71
JmCOL13	The Value of ΔΔCt	The standard error of ΔΔct
S	stem	1	0
FB	Flower bud	0.329877	0.101394
F	fruit	1.85961	0.422288
LF	leaf	2.46229	0.644816
