# Supplementary material for: Genome-wide characterization and expression analysis of the CONSTANS-like gene family of Juglans mandshurica Maxim
Source: PeerJ. 2025 Apr 18;13:e19169. doi: 10.7717/peerj.19169 (PMC12011014; doi:10.7717/peerj.19169)
Supplement: Supplemental Information 7 [file peerj-13-19169-s007.xlsx]

## Sheet: Sheet1
group	A	A	A	A	A	A	B	B	B	B	B	B
sample	A-1	A-2	A-3	A-4	A-5	A-6	B-1	B-2	B-3	B-4	B-5	B-6
JmCOL2	108.275	35.4274	37.5476	103.112	38.1635	81.2563	89.8808	35.7901	87.4189	98.8425	86.8032	105.731
JmCOL4a	30.0294	24.7446	68.5011	44.4663	11.8554	30.1069	20.9394	23.4206	18.6451	29.7184	19.9748	32.804
JmCOL4b	297.534	288.402	377.606	281.53	231.756	261.582	354.831	222.132	320.931	179.273	189.82	328.283
JmCOL5	4.11845	4.4136	18.4474	8.65462	21.6724	22.6042	5.52484	4.26308	7.82865	4.51682	3.01728	2.62452
JmCOL9a	25.487	10.6897	10.4796	31.4142	19.0764	23.6887	34.4642	7.8803	30.5834	44.087	32.7117	32.9544
JmCOL9b	29.3427	38.9962	50.8804	30.7738	60.3101	54.353	25.0941	29.7058	31.1284	35.8487	40.1928	28.6176
JmCOL10	0.30178	0.0435982	0.0821464	0.349347	0.0424578	0.313486	0.141762	0	0.585066	0.191992	0.0423233	0.519173
JmCOL11	1.06294	1.07494	1.82283	3.17618	2.30301	2.53959	0.233016	0.542043	0.499332	1.71596	0.573928	1.28005
JmCOL12	1.14743	1.10764	1.34163	1.16225	3.18463	2.11298	1.60069	0.744709	0.925593	1.62589	2.56012	0.742289
JmCOL13	143.567	92.1216	79.1941	134.99	164.21	107.171	125.648	68.4601	124.915	113.225	115.967	85.6337
JmCOL14	109.383	28.2843	23.5114	100.797	34.9051	55.9585	116.184	22.868	150.254	73.6862	50.7152	188.811
JmCOL15	142.36	46.8577	32.4196	124.415	41.179	42.9023	136.982	55.4336	194.939	92.2744	86.9022	174.582
JmCOL16a	0.718205	0.391092	0.0526345	1.95861	0.163226	0.286948	1.99832	0.39442	1.32648	3.19845	1.95252	2.54028
JmCOL16b	20.3087	15.2379	8.49799	9.64747	2.28296	12.6684	32.7551	13.9798	24.515	9.48188	8.21244	64.8801
JmCOL2	JmCOL4a	JmCOL4b	JmCOL5	JmCOL9a	JmCOL9b	JmCOL10	JmCOL11	JmCOL12	JmCOL13	JmCOL14	JmCOL15	JmCOL16a	JmCOL16b
108.275	30.0294	297.534	4.11845	25.487	29.3427	0.30178	1.06294	1.14743	143.567	109.383	142.36	0.718205	20.3087
35.4274	24.7446	288.402	4.4136	10.6897	38.9962	0.0435982	1.07494	1.10764	92.1216	28.2843	46.8577	0.391092	15.2379
37.5476	68.5011	377.606	18.4474	10.4796	50.8804	0.0821464	1.82283	1.34163	79.1941	23.5114	32.4196	0.0526345	8.49799
103.112	44.4663	281.53	8.65462	31.4142	30.7738	0.349347	3.17618	1.16225	134.99	100.797	124.415	1.95861	9.64747
38.1635	11.8554	231.756	21.6724	19.0764	60.3101	0.0424578	2.30301	3.18463	164.21	34.9051	41.179	0.163226	2.28296
81.2563	30.1069	261.582	22.6042	23.6887	54.353	0.313486	2.53959	2.11298	107.171	55.9585	42.9023	0.286948	12.6684
89.8808	20.9394	354.831	5.52484	34.4642	25.0941	0.141762	0.233016	1.60069	125.648	116.184	136.982	1.99832	32.7551
35.7901	23.4206	222.132	4.26308	7.8803	29.7058	0	0.542043	0.744709	68.4601	22.868	55.4336	0.39442	13.9798
87.4189	18.6451	320.931	7.82865	30.5834	31.1284	0.585066	0.499332	0.925593	124.915	150.254	194.939	1.32648	24.515
98.8425	29.7184	179.273	4.51682	44.087	35.8487	0.191992	1.71596	1.62589	113.225	73.6862	92.2744	3.19845	9.48188
86.8032	19.9748	189.82	3.01728	32.7117	40.1928	0.0423233	0.573928	2.56012	115.967	50.7152	86.9022	1.95252	8.21244
105.731	32.804	328.283	2.62452	32.9544	28.6176	0.519173	1.28005	0.742289	85.6337	188.811	174.582	2.54028	64.8801

## Sheet: protogynous type of bud
relevance
	JmCOL2	JmCOL4a	JmCOL4b	JmCOL5	JmCOL9a	JmCOL9b	JmCOL10	JmCOL11	JmCOL12	JmCOL13	JmCOL14	JmCOL15	JmCOL16a	JmCOL16b
JmCOL2	1	0.021	-0.148	-0.357	.896*	-0.653	.959**	0.259	-0.35	0.381	.968**	.870*	0.701	0.519
JmCOL4a	0.021	1	.904*	0.031	-0.17	-0.158	0.118	0.119	-0.553	-0.633	-0.043	-0.014	0.112	0.012
JmCOL4b	-0.148	.904*	1	-0.15	-0.45	-0.199	-0.127	-0.311	-0.631	-0.711	-0.168	-0.061	-0.139	0.21
JmCOL5	-0.357	0.031	-0.15	1	-0.12	.918**	-0.178	0.498	0.765	0.002	-0.493	-0.674	-0.493	-0.707
JmCOL9a	.896*	-0.17	-0.45	-0.12	1	-0.419	.880*	0.577	-0.003	0.627	.880*	0.748	0.763	0.131
JmCOL9b	-0.653	-0.158	-0.199	.918**	-0.419	1	-0.517	0.221	.824*	-0.046	-0.743	-.856*	-0.719	-0.708
JmCOL10	.959**	0.118	-0.127	-0.178	.880*	-0.517	1	0.425	-0.314	0.228	.863*	0.71	0.673	0.431
JmCOL11	0.259	0.119	-0.311	0.498	0.577	0.221	0.425	1	0.332	0.255	0.177	0.006	0.499	-0.597
JmCOL12	-0.35	-0.553	-0.631	0.765	-0.003	.824*	-0.314	0.332	1	0.519	-0.362	-0.477	-0.43	-0.711
JmCOL13	0.381	-0.633	-0.711	0.002	0.627	-0.046	0.228	0.255	0.519	1	0.503	0.477	0.312	-0.223
JmCOL14	.968**	-0.043	-0.168	-0.493	.880*	-0.743	.863*	0.177	-0.362	0.503	1	.961**	0.755	0.497
JmCOL15	.870*	-0.014	-0.061	-0.674	0.748	-.856*	0.71	0.006	-0.477	0.477	.961**	1	0.757	0.535
JmCOL16a	0.701	0.112	-0.139	-0.493	0.763	-0.719	0.673	0.499	-0.43	0.312	0.755	0.757	1	0.142
JmCOL16b	0.519	0.012	0.21	-0.707	0.131	-0.708	0.431	-0.597	-0.711	-0.223	0.497	0.535	0.142	1
* Significant correlation at the 0.05 level (two-tailed).
** Significant correlation at the 0.01 level (two-tailed).
	JmCOL2	JmCOL4a	JmCOL4b	JmCOL5	JmCOL9a	JmCOL9b	JmCOL10	JmCOL11	JmCOL12	JmCOL13	JmCOL14	JmCOL15	JmCOL16a	JmCOL16b
JmCOL2	1	0.021	-0.148	-0.357	0.896	-0.653	0.959	0.259	-0.35	0.381	0.968	0.87	0.701	0.519
JmCOL4a	0.021	1	0.904	0.031	-0.17	-0.158	0.118	0.119	-0.553	-0.633	-0.043	-0.014	0.112	0.012
JmCOL4b	-0.148	0.904	1	-0.15	-0.45	-0.199	-0.127	-0.311	-0.631	-0.711	-0.168	-0.061	-0.139	0.21
JmCOL5	-0.357	0.031	-0.15	1	-0.12	0.918	-0.178	0.498	0.765	0.002	-0.493	-0.674	-0.493	-0.707
JmCOL9a	0.896	-0.17	-0.45	-0.12	1	-0.419	0.88	0.577	-0.003	0.627	0.88	0.748	0.763	0.131
JmCOL9b	-0.653	-0.158	-0.199	0.918	-0.419	1	-0.517	0.221	0.824	-0.046	-0.743	-0.856	-0.719	-0.708
JmCOL10	0.959	0.118	-0.127	-0.178	0.88	-0.517	1	0.425	-0.314	0.228	0.863	0.71	0.673	0.431
JmCOL11	0.259	0.119	-0.311	0.498	0.577	0.221	0.425	1	0.332	0.255	0.177	0.006	0.499	-0.597
JmCOL12	-0.35	-0.553	-0.631	0.765	-0.003	0.824	-0.314	0.332	1	0.519	-0.362	-0.477	-0.43	-0.711
JmCOL13	0.381	-0.633	-0.711	0.002	0.627	-0.046	0.228	0.255	0.519	1	0.503	0.477	0.312	-0.223
JmCOL14	0.968	-0.043	-0.168	-0.493	0.88	-0.743	0.863	0.177	-0.362	0.503	1	0.961	0.755	0.497
JmCOL15	0.87	-0.014	-0.061	-0.674	0.748	-0.856	0.71	0.006	-0.477	0.477	0.961	1	0.757	0.535
JmCOL16a	0.701	0.112	-0.139	-0.493	0.763	-0.719	0.673	0.499	-0.43	0.312	0.755	0.757	1	0.142
JmCOL16b	0.519	0.012	0.21	-0.707	0.131	-0.708	0.431	-0.597	-0.711	-0.223	0.497	0.535	0.142	1

## Sheet: protandrous type of bud
相关性
	JmCOL2	JmCOL4a	JmCOL4b	JmCOL5	JmCOL9a	JmCOL9b	JmCOL10	JmCOL11	JmCOL12	JmCOL13	JmCOL14	JmCOL15	JmCOL16a	JmCOL16b
JmCOL2	1	0.361	0.279	-0.068	.923**	0.11	0.549	0.449	0.269	0.582	0.692	0.615	.871*	0.439
JmCOL4a	0.361	1	-0.082	-0.581	0.264	-0.085	0.216	.854*	-0.335	-0.474	0.308	0.022	0.592	0.512
JmCOL4b	0.279	-0.082	1	0.38	0.033	-.824*	0.599	-0.4	-0.467	0.197	0.786	0.795	-0.087	0.754
JmCOL5	-0.068	-0.581	0.38	1	0.019	-0.292	0.376	-0.386	-0.246	0.527	0.181	0.439	-0.293	-0.208
JmCOL9a	.923**	0.264	0.033	0.019	1	0.265	0.309	0.491	0.462	0.712	0.414	0.372	.922**	0.101
JmCOL9b	0.11	-0.085	-.824*	-0.292	0.265	1	-0.271	0.315	0.681	0.177	-0.46	-0.401	0.248	-0.619
JmCOL10	0.549	0.216	0.599	0.376	0.309	-0.271	1	0.21	-0.512	0.193	.900*	.930**	0.212	0.636
JmCOL11	0.449	.854*	-0.4	-0.386	0.491	0.315	0.21	1	-0.085	-0.189	0.143	-0.047	0.725	0.12
JmCOL12	0.269	-0.335	-0.467	-0.246	0.462	0.681	-0.512	-0.085	1	0.56	-0.409	-0.358	0.353	-0.528
JmCOL13	0.582	-0.474	0.197	0.527	0.712	0.177	0.193	-0.189	0.56	1	0.229	0.4	0.395	-0.214
JmCOL14	0.692	0.308	0.786	0.181	0.414	-0.46	.900*	0.143	-0.409	0.229	1	.948**	0.359	.851*
JmCOL15	0.615	0.022	0.795	0.439	0.372	-0.401	.930**	-0.047	-0.358	0.4	.948**	1	0.203	0.678
JmCOL16a	.871*	0.592	-0.087	-0.293	.922**	0.248	0.212	0.725	0.353	0.395	0.359	0.203	1	0.213
JmCOL16b	0.439	0.512	0.754	-0.208	0.101	-0.619	0.636	0.12	-0.528	-0.214	.851*	0.678	0.213	1
** 在 0.01 级别（双尾），相关性显著。	** At the 0.01 level (two-tailed), the correlation is significant.
* 在 0.05 级别（双尾），相关性显著。	* At the 0.05 level (two-tailed), the correlation was significant.
相关性
	JmCOL2	JmCOL4a	JmCOL4b	JmCOL5	JmCOL9a	JmCOL9b	JmCOL10	JmCOL11	JmCOL12	JmCOL13	JmCOL14	JmCOL15	JmCOL16a	JmCOL16b
JmCOL2	1	0.361	0.279	-0.068	0.923	0.11	0.549	0.449	0.269	0.582	0.692	0.615	0.871	0.439
JmCOL4a	0.361	1	-0.082	-0.581	0.264	-0.085	0.216	0.854	-0.335	-0.474	0.308	0.022	0.592	0.512
JmCOL4b	0.279	-0.082	1	0.38	0.033	-0.824	0.599	-0.4	-0.467	0.197	0.786	0.795	-0.087	0.754
JmCOL5	-0.068	-0.581	0.38	1	0.019	-0.292	0.376	-0.386	-0.246	0.527	0.181	0.439	-0.293	-0.208
JmCOL9a	0.923	0.264	0.033	0.019	1	0.265	0.309	0.491	0.462	0.712	0.414	0.372	0.922	0.101
JmCOL9b	0.11	-0.085	-0.824	-0.292	0.265	1	-0.271	0.315	0.681	0.177	-0.46	-0.401	0.248	-0.619
JmCOL10	0.549	0.216	0.599	0.376	0.309	-0.271	1	0.21	-0.512	0.193	0.9	0.93	0.212	0.636
JmCOL11	0.449	0.854	-0.4	-0.386	0.491	0.315	0.21	1	-0.085	-0.189	0.143	-0.047	0.725	0.12
JmCOL12	0.269	-0.335	-0.467	-0.246	0.462	0.681	-0.512	-0.085	1	0.56	-0.409	-0.358	0.353	-0.528
JmCOL13	0.582	-0.474	0.197	0.527	0.712	0.177	0.193	-0.189	0.56	1	0.229	0.4	0.395	-0.214
JmCOL14	0.692	0.308	0.786	0.181	0.414	-0.46	0.9	0.143	-0.409	0.229	1	0.948	0.359	0.851
JmCOL15	0.615	0.022	0.795	0.439	0.372	-0.401	0.93	-0.047	-0.358	0.4	0.948	1	0.203	0.678
JmCOL16a	0.871	0.592	-0.087	-0.293	0.922	0.248	0.212	0.725	0.353	0.395	0.359	0.203	1	0.213
JmCOL16b	0.439	0.512	0.754	-0.208	0.101	-0.619	0.636	0.12	-0.528	-0.214	0.851	0.678	0.213	1

## Sheet: Both
relevance
	JmCOL2	JmCOL4a	JmCOL4b	JmCOL5	JmCOL9a	JmCOL9b	JmCOL10	JmCOL11	JmCOL12	JmCOL13	JmCOL14	JmCOL15	JmCOL16a	JmCOL16b
JmCOL2	1	-0.043	0.011	-0.4	0.861	-0.532	0.681	0.031	-0.168	0.334	0.775	0.759	0.735	0.441
JmCOL4a	-0.043	1	0.478	0.225	-0.207	0.099	0.041	0.411	-0.339	-0.408	-0.107	-0.186	-0.103	-0.049
JmCOL4b	0.011	0.478	1	0.113	-0.193	-0.186	0.357	-0.105	-0.449	-0.147	0.391	0.318	-0.205	0.478
JmCOL5	-0.4	0.225	0.113	1	-0.335	0.869	-0.111	0.618	0.543	0.216	-0.401	-0.548	-0.595	-0.436
JmCOL9a	0.861	-0.207	-0.193	-0.335	1	-0.369	0.487	0.004	0.109	0.405	0.635	0.625	0.891	0.29
JmCOL9b	-0.532	0.099	-0.186	0.869	-0.369	1	-0.361	0.524	0.724	0.157	-0.609	-0.735	-0.561	-0.554
JmCOL10	0.681	0.041	0.357	-0.111	0.487	-0.361	1	0.099	-0.428	0.139	0.868	0.802	0.366	0.589
JmCOL11	0.031	0.411	-0.105	0.618	0.004	0.524	0.099	1	0.272	0.261	-0.173	-0.334	-0.109	-0.345
JmCOL12	-0.168	-0.339	-0.449	0.543	0.109	0.724	-0.428	0.272	1	0.559	-0.416	-0.458	-0.142	-0.515
JmCOL13	0.334	-0.408	-0.147	0.216	0.405	0.157	0.139	0.261	0.559	1	0.177	0.233	0.072	-0.266
JmCOL14	0.775	-0.107	0.391	-0.401	0.635	-0.609	0.868	-0.173	-0.416	0.177	1	0.945	0.594	0.812
JmCOL15	0.759	-0.186	0.318	-0.548	0.625	-0.735	0.802	-0.334	-0.458	0.233	0.945	1	0.591	0.674
JmCOL16a	0.735	-0.103	-0.205	-0.595	0.891	-0.561	0.366	-0.109	-0.142	0.072	0.594	0.591	1	0.415
JmCOL16b	0.441	-0.049	0.478	-0.436	0.29	-0.554	0.589	-0.345	-0.515	-0.266	0.812	0.674	0.415	1
** At the 0.01 level (two-tailed), the correlation is significant.
* At the 0.05 level (two-tailed), the correlation was significant.
