# Supplementary material for: Genome-wide characterization and expression analysis of the CONSTANS-like gene family of Juglans mandshurica Maxim
Source: PeerJ. 2025 Apr 18;13:e19169. doi: 10.7717/peerj.19169 (PMC12011014; doi:10.7717/peerj.19169)
Supplement: Supplemental Information 8 [file peerj-13-19169-s008.xlsx]

## Sheet: JmCOL4a.
	CC（protogynous female buds）-JmCOL4a expression level									CX（protogynous male buds）-JmCOL4a expression level									XC（protandrous female buds）-JmCOL4a expression level										XX（protandrous male buds）-JmCOL4a expression level
	Duncan a	Different Period	Number of cases	Subset of Alpha = 0.05						Duncan a	Different Period	Number of cases	Subset of Alpha = 0.05						Duncan a	Different Period	Number of cases	Subset of Alpha = 0.05							Duncan a	Different Period	Number of cases	Subset of Alpha = 0.05
			e	d	c	b	a					e	d	c	b	a						e	d	c	b	a						f	e	d	c	b	a
e	2025-05-13	3	0.0268							2025-04-24	3	0.1117							e	2025-04-30	3	0.1743							f	2025-04-14	3	0.1506
de	2025-04-10	3	0.0848	0.0848					e	2025-04-14	3	0.4087							e	2025-04-14	3	0.294							f	2025-04-24	3	0.2863
de	2025-04-14	3	0.3333	0.3333					e	2025-05-13	3	0.4235							e	2025-04-24	3	0.629							ef	2025-04-30	3	0.7709	0.7709
d	2025-04-30	3		0.393					e	2025-04-02	3	1							de	2025-04-02	3	1	1						ef	2025-04-02	3	1	1
c	2025-04-02	3			1				e	2025-05-04	3	1.2753							de	2025-05-13	3	1.0915	1.0915						e	2025-04-10	3		1.9549
b	2025-05-17	3				1.4431			e	2025-05-17	3		4.677						d	2025-05-17	3		1.9931						e	2025-05-22	3		1.9787
b	2025-04-24	3				1.4902			d	2025-04-10	3			6.4358					c	2025-05-04	3			3.7874					d	2025-05-13	3			5.9434
b	2025-05-22	3				1.5439			c	2025-05-22	3				9.3095				bc	2025-05-22	3			4.6764	4.6764				c	2025-05-17	3				11.4357
a	2025-05-20	3					2.5125		b	2025-04-30	3				10.2631				b	2025-04-10	3				5.2891				b	2025-05-04	3					13.8789
a	2025-05-04	3					2.8379		b	2025-05-20	3					12.9196			a	2025-05-20	3					17.8396			a	2025-05-20	3						23.5543
	significance		0.086	0.084	1	0.562	0.057		a	significance		0.093	1	1	0.126	1				significance		0.168	0.118	0.139	0.301	1				significance		0.214	0.082	1	1	1	1
	The mean of each group in the chi-subset will be shown.									The mean of each group in the chi-subset will be shown.										The mean of each group in the chi-subset will be shown.										The mean of each group in the chi-subset will be shown.
	a Sample size using the harmonic mean = 3.000									a Sample size using the harmonic mean = 3.000										a Sample size using the harmonic mean = 3.000										a Sample size using the harmonic mean = 3.000
				Expression levels at different time points
Type of flower bud	named number	Time order	Time points for sample collection	Three biological replicates			average value	(statistics) standard deviation
CC（protogynous female buds）	1	Period 1	2024-04-02	1	1	1	1	0
	1	Period2	2024-04-10	0.0833312	0.104748	0.066293	0.0847908	0.0192692
	1	Period3	2024-04-14	0.333325	0.337978	0.328736	0.333346	0.00462105
	1	Period4	2024-04-24	1.19908	1.45902	1.81254	1.49021	0.307915
	1	Period5	2024-04-30	0.464902	0.292194	0.421908	0.393002	0.0899095
	1	Period6	2024-05-04	3.22657	2.40932	2.87787	2.83792	0.410085
	1	Period7	2024-05-13	0.0158431	0.0475306	0.0171577	0.0268438	0.0179273
	1	Period8	2024-05-17	1.3566	1.63014	1.34257	1.44311	0.162131
	1	Period9	2024-05-20	2.46915	2.51047	2.55797	2.51253	0.0444471
	1	Period10	2024-05-22	1.88122	1.31142	1.43893	1.54386	0.299039
CX（protogynous male buds）	2	Period1	2024-04-02	1	1	1	1	0
	2	Period2	2024-04-10	7.46426	5.04551	6.79748	6.43575	1.24929
	2	Period3	2024-04-14	0.594604	0.609205	0.022328	0.408712	0.334698
	2	Period4	2024-04-24	0.0934281	0.0934281	0.148137	0.111664	0.031586
	2	Period5	2024-04-30	11.0171	10.7406	9.03172	10.2631	1.07535
	2	Period6	2024-05-04	1.26576	1.39146	1.16878	1.27533	0.111648
	2	Period7	2024-05-13	0.639493	0.626332	0.00479252	0.423539	0.362705
	2	Period8	2024-05-17	4.15544	4.39237	5.48313	4.67698	0.708128
	2	Period9	2024-05-20	13.4078	12.6664	12.6845	12.9196	0.422906
	2	Period10	2024-05-22	10.7406	8.97605	8.21175	9.30946	1.29696
XC（protandrous female buds）	3	Period1	2024-04-02	1	1	1	1	0
	3	Period2	2024-04-10	5.95871	5.42642	4.4822	5.28911	0.747769
	3	Period3	2024-04-14	0.392292	0.227183	0.262429	0.293968	0.0869555
	3	Period4	2024-04-24	0.594604	0.641713	0.650671	0.628996	0.0301195
	3	Period5	2024-04-30	0.189465	0.0953912	0.238159	0.174338	0.0725761
	3	Period6	2024-05-04	3.34035	4.77277	3.24901	3.78738	0.854599
	3	Period7	2024-05-13	1.21419	0.965936	1.09429	1.09147	0.124153
	3	Period8	2024-05-17	2.13613	1.82932	2.01391	1.99312	0.154459
	3	Period9	2024-05-20	19.0934	18.4254	16	17.8396	1.62776
	3	Period10	2024-05-22	3.93187	5.81589	4.28153	4.67643	1.00217
XX（protandrous male buds）	4	Period1	2024-04-02	1	1	1	1	0
	4	Period2	2024-04-10	1.95206	1.82766	2.08493	1.95489	0.128658
	4	Period3	2024-04-14	0.114626	0.175887	0.16132	0.150611	0.0320041
	4	Period4	2024-04-24	0.250671	0.31344	0.294791	0.286301	0.0322343
	4	Period5	2024-04-30	0.688172	0.815717	0.808951	0.770946	0.0717649
	4	Period6	2024-05-04	13.6422	14.3204	13.6741	13.8789	0.382693
	4	Period7	2024-05-13	4.605	6.72717	6.49802	5.9434	1.16473
	4	Period8	2024-05-17	11.6722	11.6305	11.0043	11.4357	0.374119
	4	Period9	2024-05-20	25.8125	22.3792	22.4711	23.5543	1.95625
	4	Period10	2024-05-22	1.97247	1.79005	2.17347	1.97866	0.191785
	significance（p<0.05*,p<0.01**）
Flower bud type - female-first male and female-female flower buds	**
various periods	**
Flower bud type - gynoecious* Different periods	**
Flower bud type - male-first male and female flower buds	**
various periods	**
Flower bud type - androgynous* Different periods	**
Flower bud type - female flower buds	**
various periods	**
Type of flower bud * Different periods	**
Flower bud types - male buds	*
various periods	**
Type of flower bud * Different periods	**
average value	CC	CX	XC	XX
2025-04-02	1	1	1	1
2025-04-10	0.0847908	6.43575	5.28911	1.95489
2025-04-14	0.333346	0.408712	0.293968	0.150611
2025-04-24	1.49021	0.111664	0.628996	0.286301
2025-04-30	0.393002	10.2631	0.174338	0.770946
2025-05-04	2.83792	1.27533	3.78738	13.8789
2025-05-13	0.0268438	0.423539	1.09147	5.9434
2025-05-17	1.44311	4.67698	1.99312	11.4357
2025-05-20	2.51253	12.9196	17.8396	23.5543
2025-05-22	1.54386	9.30946	4.67643	1.97866

## Sheet: JmCOL5.
CC（protogynous female buds）-JmCOL5expression level									CX（protogynous male buds）-JmCOL5expression level											XC（protandrous female buds）-JmCOL5expression level									XX（protandrous male buds）-JmCOL5expression level
Duncan a									Duncan a											Duncan a									Duncan a
Different Period	Number of cases	Subset of Alpha = 0.05							Different Period	Number of cases	Subset of Alpha = 0.05									Different Period	Number of cases	Subset of Alpha = 0.05							Different Period	Number of cases	Subset of Alpha = 0.05
		f	e	d	c	b	a				h	g	f	e	d	c	b	a				f	e	d	c	b	a				h	g	f	e	d	c	b	a
Period5f	3	0.8733							Period1h	3	1									Period2f	3	0.8449							Period3h	3	0.4267
Period2f	3	0.9167							Period6gh	3	1.4067	1.4067								Period6f	3	0.9025							Period5gh	3	0.6505	0.6505
Period1ef	3	1	1						Period7g	3		1.6933								Period3f	3	0.9413							Period6fg	3		0.9673	0.9673
Period4de	3		1.2833	1.2833					Period10f	3			2.7067							Period1f	3	1							Period1fg	3		1	1
Period6d	3			1.4533					Period5e	3				3.2233						Period5e	3		1.476						Period2f	3			1.162
Period3d	3			1.5167					Period9d	3					3.76					Period7e	3		1.7625						Period4e	3				1.815
Period7c	3				2.4767				Period8c	3						4.67				Period4d	3			2.6387					Period7d	3					4.6812
Period8c	3				2.78				Period2b	3							5.6633			Period9c	3				4.579				Period8c	3						8.3129
Period9b	3					4.25			Period4a	3								6.6533		Period10b	3					6.5149			Period9b	3							10.5921
Period10a	3						6.56		Period3a	3								6.78		Period8a	3						8.3968		Period10a	3								12.6346
significance		0.481	0.104	0.2	0.084	1	1		significance		0.065	0.184	1	1	1	1	1	0.55		significance		0.47	0.152	1	1	1	1		significance		0.257	0.099	0.349	1	1	1	1	1
The mean of each group in the chi-subset will be shown.									The mean of each group in the chi-subset will be shown.											The mean of each group in the chi-subset will be shown.									The mean of each group in the chi-subset will be shown.
a Sample size using the harmonic mean = 3.000。									a Sample size using the harmonic mean = 3.000。											a Sample size using the harmonic mean = 3.000。									a Sample size using the harmonic mean = 3.000。
				expression level
				1	2	3	average value	(statistics) standard deviation		date
CC（protogynous female buds）	1	Period1	2024-04-02	1	1	1	1	0		2024-04-02
	1	Period2	2024-04-10	0.9	0.93	0.92	0.916667	0.0152753		2024-04-10
	1	Period3	2024-04-14	1.54	1.49	1.52	1.51667	0.0251661		2024-04-14
	1	Period4	2024-04-24	1.47	1.1	1.28	1.28333	0.185023		2024-04-24
	1	Period5	2024-04-30	0.86	0.85	0.91	0.873333	0.0321455		2024-04-30
	1	Period6	2024-05-04	1.58	1.11	1.67	1.45333	0.300721		2024-05-04
	1	Period7	2024-05-13	2.76	2.12	2.55	2.47667	0.326241		2024-05-13
	1	Period8	2024-05-17	2.96	2.83	2.55	2.78	0.209523		2024-05-17
	1	Period9	2024-05-20	4.18	4.05	4.52	4.25	0.242693		2024-05-20
	1	Period10	2024-05-22	6.66	6.78	6.24	6.56	0.283549		2024-05-22
CX（protogynous male buds）	2	Period1	2024-04-02	1	1	1	1	0
	2	Period2	2024-04-10	5.51	5.96	5.52	5.66333	0.25697
	2	Period3	2024-04-14	6.67	6.88	6.79	6.78	0.105357
	2	Period4	2024-04-24	6.45	6.53	6.98	6.65333	0.285715
	2	Period5	2024-04-30	3.33	3.21	3.13	3.22333	0.100664
	2	Period6	2024-05-04	1.23	1.03	1.96	1.40667	0.489524
	2	Period7	2024-05-13	1.68	1.53	1.87	1.69333	0.170392
	2	Period8	2024-05-17	4.93	4.23	4.85	4.67	0.383145
	2	Period9	2024-05-20	3.76	3.65	3.87	3.76	0.11
	2	Period10	2024-05-22	2.61	2.54	2.97	2.70667	0.230723
XC（protandrous female buds）	3	Period1	2024-04-02	1	1	1	1	0
	3	Period2	2024-04-10	0.834839	0.86	0.84	0.844946	0.427525
	3	Period3	2024-04-14	0.922937	0.901	1	0.941312	0.0305505
	3	Period4	2024-04-24	2.686	2.27	2.96	2.63867	0.22758
	3	Period5	2024-04-30	1.22801	1.45	1.75	1.476	0.0300142
	3	Period6	2024-05-04	0.867373	0.88	0.96	0.902458	0.0469375
	3	Period7	2024-05-13	1.54756	1.76	1.98	1.76252	0.308359
	3	Period8	2024-05-17	8.13044	8.97	8.09	8.39681	0.270929
	3	Period9	2024-05-20	4.77713	4.37	4.59	4.57904	0.208693
	3	Period10	2024-05-22	6.5448	6.34	6.66	6.51493	0.317246
XX（protandrous male buds）	4	Period1	2024-04-02	1	1	1	1	0
	4	Period2	2024-04-10	0.816099	1.03	1.64	1.16203	0.427525
	4	Period3	2024-04-14	0.4	0.42	0.46	0.426667	0.0305505
	4	Period4	2024-04-24	1.56493	2.01	1.87	1.81498	0.22758
	4	Period5	2024-04-30	0.651599	0.62	0.68	0.650533	0.0300142
	4	Period6	2024-05-04	0.951883	1.02	0.93	0.967294	0.0469375
	4	Period7	2024-05-13	4.73362	4.35	4.96	4.68121	0.308359
	4	Period8	2024-05-17	8.33882	8.03	8.57	8.31294	0.270929
	4	Period9	2024-05-20	10.5062	10.44	10.83	10.5921	0.208693
	4	Period10	2024-05-22	12.9439	12.31	12.65	12.6346	0.317246
		significance（p<0.05*,p<0.01**）
Flower bud type - female-first male and female-female flower buds		**			CC	CX	XC	XX
various periods		**		2024-04-02	1	1	1	1
Flower bud type - gynoecious* Different periods		**		2024-04-10	0.916667	5.66333	0.844946	1.16203
Flower bud type - male-first male and female flower buds		**		2024-04-14	1.51667	6.78	0.941312	0.426667
various periods		**		2024-04-24	1.28333	6.65333	2.63867	1.81498
Flower bud type - androgynous* Different periods		**		2024-04-30	0.873333	3.22333	1.476	0.650533
Flower bud type - female flower buds		**		2024-05-04	1.45333	1.40667	0.902458	0.967294
various periods		**		2024-05-13	2.47667	1.69333	1.76252	4.68121
Type of flower bud * Different periods		**		2024-05-17	2.78	4.67	8.39681	8.31294
Flower bud types - male buds		**		2024-05-20	4.25	3.76	4.57904	10.5921
various periods		**		2024-05-22	6.56	2.70667	6.51493	12.6346
Type of flower bud * Different periods		**		2024-04-02	0	0	0	0
				2024-04-10	0.0152753	0.25697	0.427525	0.427525
				2024-04-14	0.0251661	0.105357	0.0305505	0.0305505
				2024-04-24	0.185023	0.285715	0.22758	0.22758
				2024-04-30	0.0321455	0.100664	0.0300142	0.0300142
				2024-05-04	0.300721	0.489524	0.0469375	0.0469375
				2024-05-13	0.326241	0.170392	0.308359	0.308359
				2024-05-17	0.209523	0.383145	0.270929	0.270929
				2024-05-20	0.242693	0.11	0.208693	0.208693
				2024-05-22	0.283549	0.230723	0.317246	0.317246
